# Supplementary material for: Lateral fluoro-substitution and chiral effects on supramolecular liquid crystals containing rod-like and H-bonded bent-core mesogens
Source: Royal Society of Chemistry journal article supplement (doi:10.1039/c6ra19266a), 2016-01-01
Supplement: c6ra19266a1.pdf [file c6ra19266a1.pdf]

## Supporting information

### Lateral fluoro-substitution and chiral effects on supramolecular liquid crystals containing rod-like and H-bonded bent-core mesogens

Chun-Chieh Han,<sup>a</sup> Li-Han Yang,<sup>a</sup> Putikam Raghunath,<sup>b</sup> Ming-Chang Lin, Rohit Kumar<sup>a</sup> and Hong-Cheu Lin<sup>\*a</sup>

<sup>a</sup>Department of Materials Science and Engineering, National Chiao Tung University, Hsinchu, Taiwan

<sup>b</sup>Center for Interdisciplinary Molecular Science, Department of Applied Chemistry, National Chiao Tung University, Hsinchu, Taiwan

\*Corresponding author. Email: linhc@mail.nctu.edu.tw (Prof. Hong-Cheu Lin)

|                                                                                                                                                                                               |         |
|-----------------------------------------------------------------------------------------------------------------------------------------------------------------------------------------------|---------|
| (1) Phase transition temperatures <sup>a,b</sup> (°C) and enthalpies (J g <sup>-1</sup> ) of supramolecular complexes <b>P<sub>III</sub></b> */ <b>A<sub>II</sub></b> * obtained by DSC ..... | page 2  |
| (2) Molecular simulation of supramolecular diads <b>C/D</b> .....                                                                                                                             | page 3  |
| (3) Molecular arrangement of SmA phases in supramolecular diads <b>C/D</b> .....                                                                                                              | page 4  |
| (4) Additional details of synthetic procedures .....                                                                                                                                          | page 5  |
| (5) Mass spectra of H-acceptors <b>C</b> .....                                                                                                                                                | page 14 |
| (6) Infrared spectra of H-acceptors <b>C</b> .....                                                                                                                                            | page 16 |

**Table S1** Phase transition temperatures<sup>a,b</sup> (°C) and enthalpies (J g<sup>-1</sup>) of supramolecular complexes **P<sub>III</sub><sup>\*</sup>/A<sub>II</sub><sup>\*</sup>** with various molar ratios of H-donor **A<sub>II</sub><sup>\*</sup>**

|                                                               | H-donor<br><b>A<sub>II</sub><sup>*</sup></b> (mol%) | Phase transition temperatures<br>(°C) [enthalpies (J g <sup>-1</sup> )]     | $\Delta T_{\text{BPI}}$<br>(°C) | $\Delta T_{\text{N}^*}$<br>(°C) | $\Delta T_{\text{SmA}}$<br>(°C) |
|---------------------------------------------------------------|-----------------------------------------------------|-----------------------------------------------------------------------------|---------------------------------|---------------------------------|---------------------------------|
| <b>P<sub>III</sub><sup>*</sup>/A<sub>II</sub><sup>*</sup></b> | 50                                                  | Iso 151.2 [0.45] BP 137.5 <sup>c</sup> N* 106.6 [2.02]<br>SmA 68.2 [0.99] K | 13.7                            | 33.8                            | 38.4                            |
| <b>P<sub>III</sub><sup>*</sup>/A<sub>II</sub><sup>*</sup></b> | 55                                                  | Iso 152.2 [0.45] BP 138.7 <sup>c</sup> N* 103.8 [2.02]<br>SmA 70.2 [0.99] K | 13.5                            | 34.9                            | 33.6                            |
| <b>P<sub>III</sub><sup>*</sup>/A<sub>II</sub><sup>*</sup></b> | 60                                                  | Iso 149.9 [0.45] BP 142.5 <sup>c</sup> N* 105.6 [2.02]<br>SmA 75.8 [0.99] K | 7.4                             | 36.9                            | 29.8                            |
| <b>P<sub>III</sub><sup>*</sup>/A<sub>II</sub><sup>*</sup></b> | 65                                                  | Iso 145.8 [0.45] BP 142.6 <sup>c</sup> N* 98.7 [2.02]<br>SmA 73.4 [0.99] K  | 3.2                             | 43.9                            | 25.3                            |
| <b>P<sub>III</sub><sup>*</sup>/A<sub>II</sub><sup>*</sup></b> | 70                                                  | Iso 146.9 [0.45] N* 99.8 [2.02] SmA 78.1<br>[0.99] K                        |                                 | 47.1                            | 21.7                            |
| <b>P<sub>III</sub><sup>*</sup>/A<sub>II</sub><sup>*</sup></b> | 75                                                  | Iso 151.4 [0.45] N* 99.9 [2.02] SmA 82.5<br>[0.99] K                        |                                 | 51.5                            | 17.4                            |

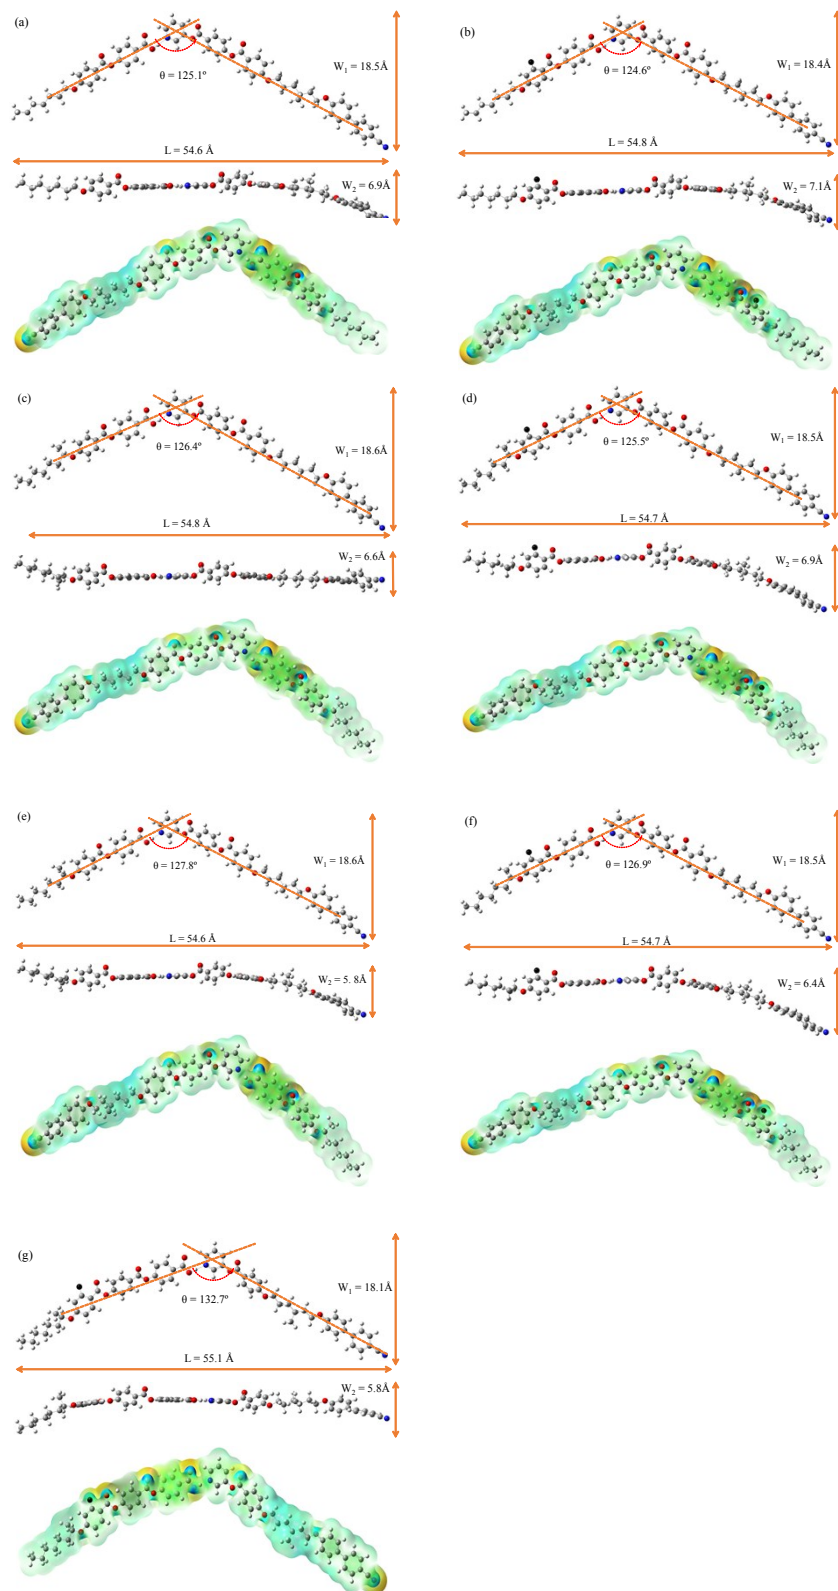

**Fig. S1** Molecular models (top photos) and molecular electrostatic potentials mapped on the electron densities (bottom photos) of the lowest energy structures for supramolecular diads (a)  $P_{III}^*/A_{II}$ , (b)  $P_{III}^*/A_{II}F$ , (c)  $P_{III}/A_{II}^*$ , (d)  $P_{III}/A_{II}F^*$ , (e)  $P_{III}^*/A_{II}^*$ , (f)  $P_{III}^*/A_{II}F^*$  and (g)  $P_{II}^*/A_{III}F^*$ .

**Table S2** XRD data of supramolecular diads **C/D**

|                                          | Theoretical molecular length<br>(Å) | <i>d</i> -spacing<br>(Å) | Mesophase | Measured<br>temperature (°C)<br>upon cooling |
|------------------------------------------|-------------------------------------|--------------------------|-----------|----------------------------------------------|
| <b>P<sub>III</sub>*/A<sub>II</sub></b>   | 54.6                                | 61.2                     | SmA       | 69                                           |
| <b>P<sub>III</sub>*/A<sub>II</sub>F</b>  | 54.8                                | 60.9                     | SmA       | 67                                           |
| <b>P<sub>III</sub>/A<sub>II</sub>*</b>   | 54.8                                | 62.3                     | SmA       | 77                                           |
| <b>P<sub>III</sub>/A<sub>II</sub>F*</b>  | 54.9                                | 61.8                     | SmA       | 81                                           |
| <b>P<sub>III</sub>*/A<sub>II</sub>*</b>  | 54.6                                | 59.4                     | SmA       | 87                                           |
| <b>P<sub>III</sub>*/A<sub>II</sub>F*</b> | 54.7                                | 58.7                     | SmA       | 74                                           |
| <b>P<sub>II</sub>*/A<sub>III</sub>F*</b> | 55.1                                | 57.6                     | SmA       | 99                                           |

\*Theoretical molecular lengths were calculated by molecular simulation; the *d*-spacing values were obtained by X-ray diffraction (XRD); the measured temperatures were controlled within the smectic A (SmA) phase observed by polarizing optical microscopy (POM).

## Additional details of synthetic procedures

Synthesis of H-accepters **C** (i.e., **P<sub>III</sub>**, **P<sub>III</sub>\*** and **P<sub>II</sub>\***) along with H-donors **D** (i.e., **A<sub>II</sub>**, **A<sub>II</sub>F**, **A<sub>II</sub>\***, **A<sub>II</sub>F\*** and **A<sub>III</sub>F\***) are shown in Schemes S1 and S2, respectively.

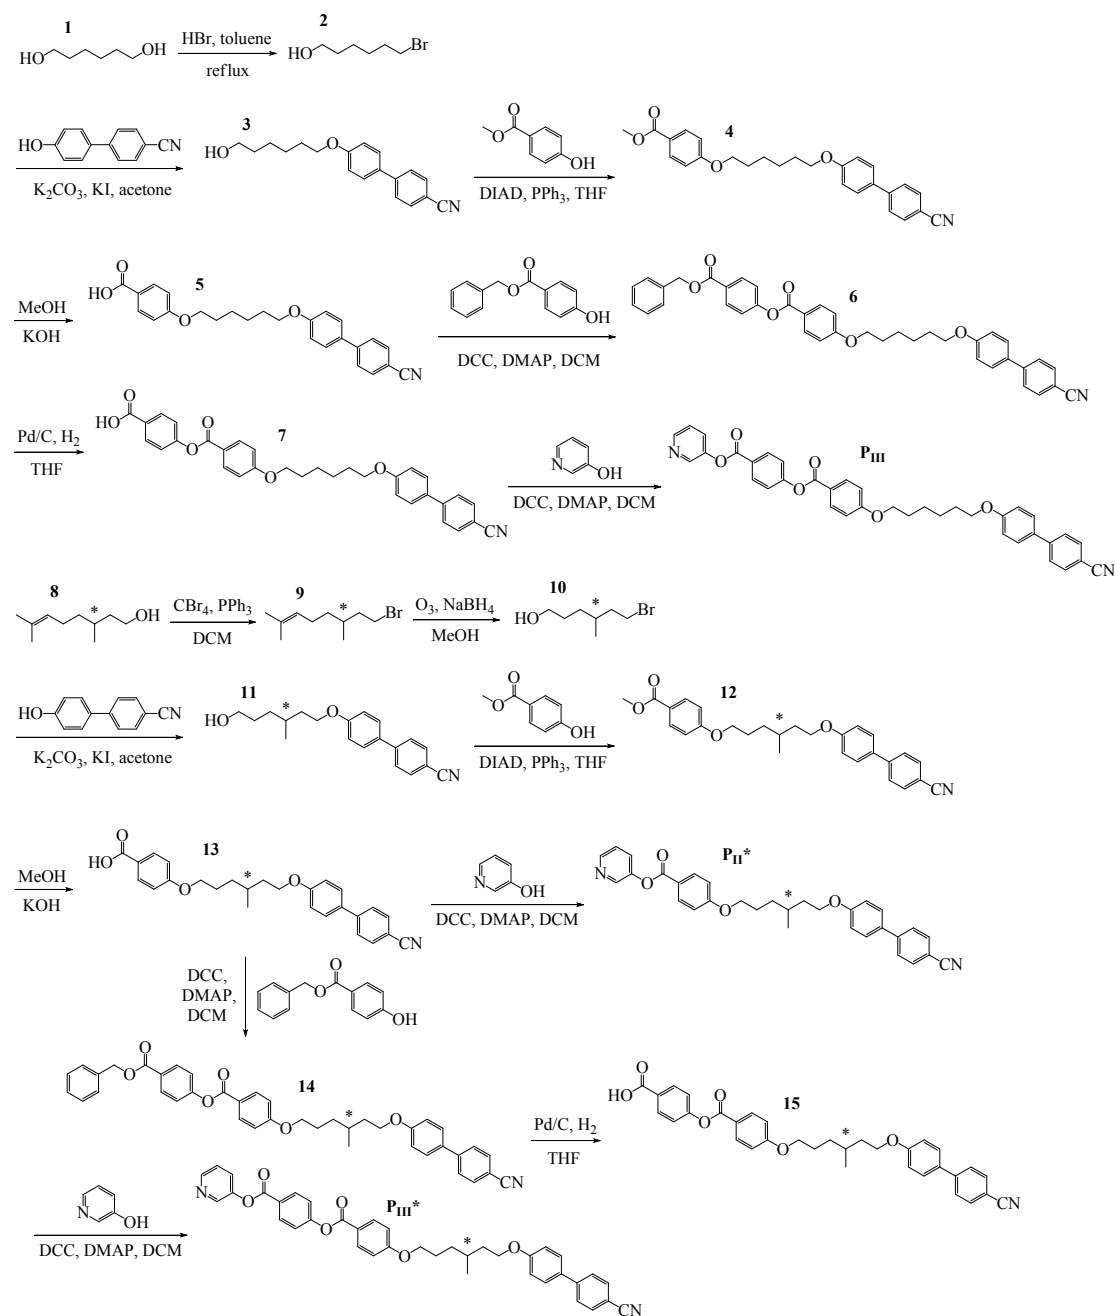

**Scheme S1** Synthesis of H-accepters **C** (i.e., **P<sub>III</sub>**, **P<sub>III</sub>\*** and **P<sub>II</sub>\***).

(i) **Synthesis of compound 2.** Hexane-1,6-diol (compound **1**) (10g, 85mmole) was dissolved in 500ml toluene at reflux temperature. Then, HBr (7.2g, 89mmole) was slowly added in toluene solution, and reacted overnight. After reaction, the solution was concentrated using a rotary evaporator. The residue was purified by column chromatography on silica (*n*-hexane). The final product as a light yellow oil has the yield of 90%. <sup>1</sup>H NMR (300 MHz, CDCl<sub>3</sub>) δ(ppm): 3.72 (t, *J* = 5.8 Hz, 2H, -OCH<sub>2</sub>-), 3.51 (t, *J* = 6.1 Hz, 2H, -OCH<sub>2</sub>-), 1.81-1.42 (m, 8H, -CH<sub>2</sub>-).

(ii) **Synthesis of compound 3.** 4-Cyano-4'-hydroxybiphenyl (5g, 25.6mmole), K<sub>2</sub>CO<sub>3</sub> (10.64g, 76.8mmole) and KI (3.25g,

12.8mmole) were dissolved in 250 ml acetone. Then, compound **2** (6g, 30.72mmole) was slowly added in acetone solution and reacted overnight at 60°C. After reaction, the solution was concentrated using a rotary evaporator. The residue was purified by column chromatography on silica (*n*-hexane). The final product as a white solid has the yield of 95%. <sup>1</sup>H NMR (300 MHz, CDCl<sub>3</sub>) δ(ppm): 7.82 (t, *J* = 5.4 Hz, 4H, Ar-H), 7.61 (d, *J* = 8.3 Hz, 2H, Ar-H), 7.10 (d, *J* = 8.2 Hz, 2H, Ar-H), 4.12 (t, *J* = 6.2 Hz, 2H, -OCH<sub>2</sub>), 3.63 (t, *J* = 5.8 Hz, 2H, -OCH<sub>2</sub>), 1.82-1.41 (m, 8H, -CH<sub>2</sub>).

**(iii) Synthesis of compound 4.** Compound **3** (5g, 16.9mmole) and PPh<sub>3</sub> (6.65g, 25.3mmol) were dissolved in dry THF. Then added methyl 4-hydroxybenzoate (3.15g, 20.3mmol) and DIAD (5.1g, 25.3mmol) in THF solution. After reaction, the solution was concentrated using a rotary evaporator. The residue was purified by column chromatography on silica (*n*-hexane/DCM = 5:1, v/v). The final product as a white solid has the yield of 80%. <sup>1</sup>H NMR (300 MHz, CDCl<sub>3</sub>) δ(ppm): 7.83 (s, 4H, Ar-H), 7.62 (d, *J* = 8.7 Hz, 2H, Ar-H), 7.12 (d, *J* = 8.2 Hz, 2H, Ar-H), 7.03 (d, *J* = 7.9 Hz, 2H, Ar-H), 6.83 (d, *J* = 7.8 Hz, 2H, Ar-H), 4.06 (t, *J* = 6.5 Hz, 4H, -OCH<sub>2</sub>-), 3.84 (s, 3H, -OCH<sub>2</sub>-), 1.76 (m, 4H, -CH<sub>2</sub>-), 1.42 (d, *J* = 7.8 Hz, 4H, -CH<sub>2</sub>-).

**(iv) Synthesis of compound 5.** Compound **4** (5g, 11.6mmol) and KOH (1.96g, 34.9mmol) were dissolved in MeOH solvent. The mixed solution was reacted for 24 hours at 90°C. After reaction, the solution was concentrated using a rotary evaporator, then added HCl aqueous solution until pH=3. The final product as a white solid (yield: 92%). <sup>1</sup>H NMR (300 MHz, CDCl<sub>3</sub>) δ(ppm): 8.15 (d, *J* = 7.7 Hz, 2H, Ar-H), 7.83 (s, 4H, Ar-H), 7.67 (d, *J* = 7.5 Hz, 2H, Ar-H), 7.20 (d, *J* = 7.5 Hz, 2H, Ar-H), 7.02 (d, *J* = 7.6 Hz, 2H, Ar-H), 4.11 (t, *J* = 6.0 Hz, 4H, -OCH<sub>2</sub>-), 1.71 (m, 4H, -CH<sub>2</sub>-), 1.35 (d, *J* = 7.8 Hz, 4H, -CH<sub>2</sub>-).

**(v) Synthesis of compound 6.** Compound **5** (5g, 12mmole), benzyl 4-hydroxybenzoate (3.3g, 14.4mmol) and DMAP (0.15 g, 1.2mmol) were dissolved in dry DCM upon nitrogen system, then added DCC (7.5g, 36mmol). The solution was reacted for 16 hours at room temperature (30°C). After reaction, the solution first through filtration followed by DCM washing. The solution was extracted with deionized water/DCM, then the organic phase of solution was obtained. The organic phase was dried by MgSO<sub>4</sub> and concentrated using a rotary evaporator. The residue was purified by column chromatography on silica (*n*-hexane/DCM = 5:1, v/v). The final product as a white solid has the yield of yield: 85%. <sup>1</sup>H NMR (300 MHz, CDCl<sub>3</sub>) δ(ppm): 8.15 (d, *J* = 7.9 Hz, 2H, Ar-H), 8.15 (d, *J* = 8.1 Hz, 2H, Ar-H), 8.09 (d, *J* = 7.8 Hz, 2H, Ar-H), 7.84 (s, 4H, Ar-H), 7.62 (d, *J* = 7.9 Hz, 2H, Ar-H), 7.45 (d, *J* = 7.6 Hz, 2H, Ar-H), 7.42-7.30 (m, 5H, Ar-H), 7.14 (d, *J* = 8.0 Hz, 2H, Ar-H), 7.05 (d, *J* = 7.8 Hz, 2H, Ar-H), 5.25 (s, 2H, -OCH<sub>2</sub>Ph), 4.12 (t, *J* = 5.8 Hz, 4H, -OCH<sub>2</sub>-), 1.72 (m, 5H, -CH<sub>2</sub>-), 1.23 (m, 4H, -CH<sub>2</sub>-).

**(vi) Synthesis of compound 7.** Compound **6** (5g, 8mmole) and 15% Pd/C (0.75g) were dissolved in dry THF. The mixed solution was reacted overnight at room temperature in hydrogen system. After reaction, the solution was first filtrated and followed by THF washing, then was concentrated using a rotary evaporator. The residue was recrystallization by *n*-hexane/DCM. The final product as a white solid has the yield of yield: 88%. <sup>1</sup>H NMR (300 MHz, CDCl<sub>3</sub>) δ(ppm): 8.30 (d, *J* = 7.7 Hz, 2H, Ar-H), 8.15 (d, *J* = 8.2 Hz, 2H, Ar-H), 7.85 (s, 4H, Ar-H), 7.65 (d, *J* = 7.4 Hz, 2H, Ar-H), 7.54 (d, *J* = 7.9 Hz, 2H, Ar-H), 7.15 (d, *J* = 7.5 Hz, 2H, Ar-H), 7.02 (d, *J* = 8.2 Hz, 2H, Ar-H), 4.10 (t, *J* = 5.8 Hz, 4H, -OCH<sub>2</sub>-), 1.73 (m, 4H, -CH<sub>2</sub>-), 1.21 (m, 4H, -CH<sub>2</sub>-).

**(vii) Synthesis of H-accepter P<sub>III</sub>.** Compound **7** (2g, 3.7mmole), pyridin-3-ol (0.415g, 4.48mmol) and DMAP (0.048g, 0.37mmol) were dissolved in dry DCM upon nitrogen system, then DCC (2.27g, 11.1mmol) was added. The solution was reacted for 16 hours at room temperature. After reaction, the solution first through filtration followed by DCM washing. The solution was extracted with deionized water/DCM, then the organic phase of solution was obtained. The organic phase was dried by MgSO<sub>4</sub> and concentrated using a rotary evaporator. The residue was purified by column chromatography on silica (*n*-hexane/DCM = 5:3, v/v). The final product as a white solid has the yield of 60%. FTIR (KBr, ν<sub>max</sub>/cm<sup>-1</sup>): 2936, 2851 (-CH<sub>2</sub>-), 2226 (C=N=C in pyridine), 1732 (O=C=O), 1605 (-CN), 1510, 1493, 1472 (C=C in Ar), 1201 (C-O-C).

**(viii) Synthesis of compound 9.** (S)-(-)- $\beta$ -Citronellol (sample **8**) (5g, 32mmole) and  $\text{CBr}_4$  (11.5g, 35.2mmole) were dissolved in dry DCM at  $0^\circ\text{C}$  ice bath. Then, appropriate  $\text{PPh}_3$  was slowly added in DCM solution. After reaction, the solution was concentrated using a rotary evaporator. The residue was purified by column chromatography on silica (*n*-hexane). The final product as a colorless liquid has the yield of 80%.  $^1\text{H NMR}$  (300 MHz,  $\text{CDCl}_3$ )  $\delta$ (ppm): 5.22 (t,  $J = 6.1$  Hz, 1H, -CH), 3.43 (t,  $J = 5.9$  Hz, 2H,  $-\text{CH}_2\text{Br}$ ), 2.30-1.52 (m, 9H, -CH &  $-\text{CH}_2$ ), 1.02 (t,  $J = 6.3$  Hz, 3H,  $-\text{CH}_3$ ).

**(ix) Synthesis of compound 10.** Compound **9** (5g, 22.93mmole) was dissolved in MeOH at  $-15^\circ\text{C}$  upon  $\text{O}_3$  system. After reaction (30min later),  $\text{NaBH}_4$  (0.88g, 22.93mmole) was added in MeOH solution upon atmospheric system. After 2hr, ice and 3ml  $\text{H}_2\text{SO}_4$  were added in MeOH solution. Then, the solution was extracted with deionized water/choloroform, then the organic phase of solution was obtained The organic phase was dried by  $\text{MgSO}_4$  and concentrated using a rotary evaporator. The residue was purified by column chromatography on silica (*n*-hexane/EA = 10:1, v/v). The final product as a colorless liquid has the yield of 73%.  $^1\text{H NMR}$  (300 MHz,  $\text{CDCl}_3$ )  $\delta$ (ppm): 3.82 (t,  $J = 6.0$  Hz, 2H,  $-\text{OCH}_2$ ), 3.42 (t,  $J = 5.8$  Hz, 2H,  $-\text{OCH}_2\text{Br}$ ), 1.82-1.41 (m, 7H,  $-\text{CH}_2$ ), 1.00(t,  $J = 6.1$  Hz, 3H,  $-\text{CH}_3$ ).

**(x) Synthesis of compound 11.** 4-Cyano-4'-hydroxybiphenyl (5g, 25.6mmole),  $\text{K}_2\text{CO}_3$  (10.64g, 76.8mmole) and KI (3.25g, 12.8mmole) were dissolved in 250 ml acetone. Then, product **10** (6.42g, 76.8mmole) was slowly added in acetone solution and reacted overnight at  $60^\circ\text{C}$ . After reaction, the solution was concentrated using a rotary evaporator. The residue was purified by column chromatography on silica (*n*-hexane). The final product as a white solid has the yield of 95%.  $^1\text{H NMR}$  (300 MHz,  $\text{CDCl}_3$ )  $\delta$ (ppm): 7.82 (t,  $J = 5.7$  Hz, 4H, Ar-H), 7.61 (d,  $J = 7.9$  Hz, 2H, Ar-H), 7.05 (d,  $J = 8.7$  Hz, 2H, Ar-H), 4.20 (t,  $J = 6.3$  Hz, 2H,  $-\text{OCH}_2$ ), 4.00 (t,  $J = 5.7$  Hz, 2H,  $-\text{OCH}_2$ ), 1.82-1.22 (m, 7H,  $-\text{CH}_2$ ), 1.00 (t,  $J = 6.1$  Hz, 3H,  $-\text{CH}_3$ ).

**(xi) Synthesis of product 12.** Compound **11** (5g, 16.2mmole) and  $\text{PPh}_3$  (6.39g, 24.3mmol) were dissolved in dry THF. Then added methyl 4-hydroxybenzoate (2.95g, 19mmol) and DIAD (4.9g, 24.3mmol) were added in THF solution. After reaction, the solution was concentrated using a rotary evaporator. The residue was purified by column chromatography on silica (*n*-hexane/DCM = 5:1, v/v). The final product as a light yellow oil has the yield of 80%.  $^1\text{H NMR}$  (300 MHz,  $\text{CDCl}_3$ )  $\delta$ (ppm): 7.88 (s, 4H, Ar-H), 7.68 (d,  $J = 8.1$  Hz, 2H, Ar-H), 7.10 (d,  $J = 8.0$  Hz, 2H, Ar-H), 7.05 (d,  $J = 7.9$  Hz, 2H, Ar-H), 6.80 (d,  $J = 8.3$  Hz, 2H, Ar-H), 4.05 (t,  $J = 6.3$  Hz, 4H,  $-\text{OCH}_2$ -), 3.89 (s, 3H,  $-\text{OCH}_2$ -), 1.75-1.60 (m, 5H,  $-\text{CH}_2$ -), 1.21 (m, 2H,  $-\text{CH}_2$ -), 0.96 (d,  $J = 8.4$  Hz, 3H,  $-\text{CH}_3$ ).

**(xii) Synthesis of compound 13.** Compound **12** (5g, 11.3mmol), KOH (1.9g, 33.9mmol) were dissolved in MeOH solvent. The mixed solution was reacted for 24 hours at  $90^\circ\text{C}$ . After reaction, the solution was concentrated using a rotary evaporator, then added HCl aqueous solution until pH=3. The final product as a white solid has the yield of 92%.  $^1\text{H NMR}$  (300 MHz,  $\text{CDCl}_3$ )  $\delta$ (ppm): 8.10 (d,  $J = 7.8$  Hz, 2H, Ar-H), 7.85 (s, 4H, Ar-H), 7.70 (d,  $J = 8.3$  Hz, 2H, Ar-H), 7.25 (d,  $J = 7.9$  Hz, 2H, Ar-H), 7.03 (d,  $J = 8.2$  Hz, 2H, Ar-H), 4.01 (t,  $J = 6.3$  Hz, 4H,  $-\text{OCH}_2$ -), 1.71-1.65 (m, 5H,  $-\text{CH}_2$ -), 1.25 (m, 2H,  $-\text{CH}_2$ -), 1.03 (d,  $J = 8.1$  Hz, 3H,  $-\text{CH}_3$ ).

**(xiii) Synthesis of H-accepter  $\text{P}_{\text{II}}^*$ .** Compound **13** (2g, 3.81mmole), pyridin-3-ol (0.43g, 4.6mmol) and DMAP (0.05g, 0.381mmol) were dissolved in dry DCM upon nitrogen system, then DCC (2.38g, 11.43mmol) was added. The solution was reacted for 16 hours at room temperature. After reaction, the solution first through filtration followed by DCM washing. The solution was extracted with deionized water/DCM, then the organic phase of solution was obtained The organic phase was dried by  $\text{MgSO}_4$  and concentrated using a rotary evaporator. The residue was purified by column chromatography on silica (*n*-hexane/DCM = 5:3, v/v). The final product as a white solid has the yield of 60%. FTIR (KBr,  $\nu_{\text{max}}/\text{cm}^{-1}$ ): 3063, 3040 ( $-\text{CH}_3$ ), 2930, 2861 ( $-\text{CH}_2$ -), 2226 (C-N=C in pyridine), 1733 (O-C=O), 1602 ( $-\text{CN}$ ), 1514, 1493, 1471 (C=C in Ar), 1204 (C-O-C).

**(xiv) Synthesis of compound 14.** Compound **13** (5g, 11.6mmole), benzyl 4-hydroxybenzoate (3.2g, 14mmol) and DMAP (0.145 g, 1.16mmol) were dissolved in dry DCM upon nitrogen system, then added DCC (7.2g, 34.8mmol). The solution was reacted for 16 hours at room temperature (30°C). After reaction, the solution first through filtration followed by DCM washing. The solution was extracted with deionized water/DCM, then the organic phase of solution was obtained. The organic phase was dried by MgSO<sub>4</sub> and concentrated using a rotary evaporator. The residue was purified by column chromatography on silica (*n*-hexane/DCM = 5:1, v/v). The final product as a white solid has the yield of 85%. <sup>1</sup>H NMR (300 MHz, CDCl<sub>3</sub>) δ(ppm): 8.20 (d, *J* = 8.2 Hz, 2H, Ar-H), 8.10 (d, *J* = 7.8 Hz, 2H, Ar-H), 7.82 (s, 4H, Ar-H), 7.65 (d, *J* = 7.7 Hz, 2H, Ar-H), 7.50 (d, *J* = 7.9 Hz, 2H, Ar-H), 7.45-7.35 (m, 5H, Ar-H), 7.12 (d, *J* = 8.2 Hz, 2H, Ar-H), 7.01 (d, *J* = 8.1 Hz, 2H, Ar-H), 5.20 (s, 2H, -OCH<sub>2</sub>Ph), 4.10 (t, *J* = 5.9 Hz, 4H, -OCH<sub>2</sub>-), 1.70-1.55 (m, 5H, -CH<sub>2</sub>-), 1.23 (m, 2H, -CH<sub>2</sub>-), 1.00 (d, *J* = 7.6 Hz, 3H, -CH<sub>3</sub>).

**(xv) Synthesis of compound 15.** Compound **14** (5g, 7.8mmole) and 15% Pd/C (0.75g) were dissolved in dry THF. The mixed solution was reacted overnight at room temperature in hydrogen system. After reaction, the solution first through filtration followed by THF washing, then concentrated using a rotary evaporator. The residue was recrystallization by *n*-hexane/DCM. The final product as a white solid has the yield of 88%. <sup>1</sup>H NMR (300 MHz, CDCl<sub>3</sub>) δ(ppm): 8.30 (d, *J* = 7.8 Hz, 2H, Ar-H), 8.15 (d, *J* = 7.7 Hz, 2H, Ar-H), 7.85 (s, 4H, Ar-H), 7.70 (d, *J* = 8.0 Hz, 2H, Ar-H), 7.60 (d, *J* = 7.9 Hz, 2H, Ar-H), 7.14 (d, *J* = 8.0 Hz, 2H, Ar-H), 7.05 (d, *J* = 8.1 Hz, 2H, Ar-H), 4.07 (t, *J* = 6.5 Hz, 4H, -OCH<sub>2</sub>-), 1.71-1.65 (m, 5H, -CH<sub>2</sub>-), 1.21 (m, 2H, -CH<sub>2</sub>-), 0.99 (d, *J* = 7.8 Hz, 3H, -CH<sub>3</sub>).

**(xvi) Synthesis of H-accepter P<sub>III</sub>\*.** Compound **15** (2g, 3.1mmole), pyridin-3-ol (0.345g, 3.72mmol) and DMAP (0.04g, 0.31mmol) were dissolved in dry DCM upon nitrogen system, then DCC (1.9g, 9.3mmol) was added. The solution was reacted for 16 hours at room temperature. After reaction, the solution first through filtration followed by DCM washing. The solution was extracted with deionized water/DCM, then the organic phase of solution was obtained. The organic phase was dried by MgSO<sub>4</sub> and concentrated using a rotary evaporator. The residue was purified by column chromatography on silica (*n*-hexane/DCM = 5:3, v/v). The final product as a white solid has the yield of 60%. FTIR (KBr, ν<sub>max</sub>/cm<sup>-1</sup>): 3075, 3042 (-CH<sub>3</sub>), 2933, 2853 (-CH<sub>2</sub>-), 2228 (C-N=C in pyridine), 1742 (O-C=O), 1603 (-CN), 1511, 1496, 1475 (C=C in Ar), 1211 (C-O-C).



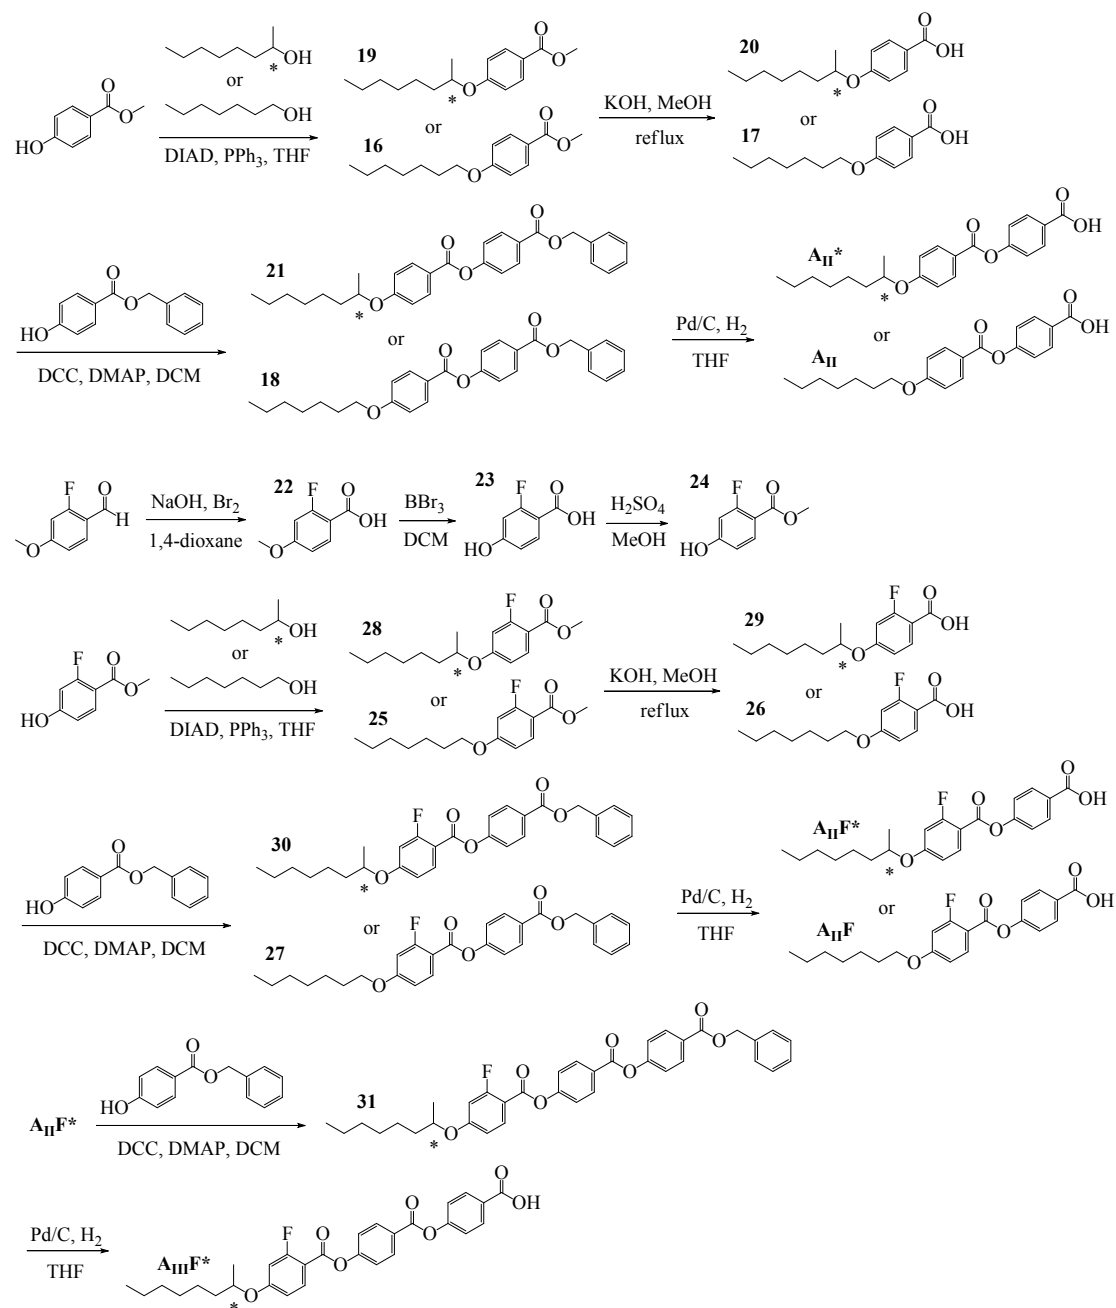

**Scheme S2** Synthesis of H-donors **D** (i.e., **A<sub>II</sub>**, **A<sub>II</sub>F**, **A<sub>II</sub>\***, **A<sub>II</sub>F\*** and **A<sub>III</sub>F\***).

(i) **Synthesis of compound 16.** Benzyl 4-hydroxybenzoate (4.47g, 29.4mmol) and PPh<sub>3</sub> (8.89g, 33.8mmol) were dissolved in dry THF. Then added octanol (4.09g, 35.2mmol) and DIAD (8.9g, 44mmol) in THF solution. After reaction, the solution was concentrated using a rotary evaporator. The residue was purified by column chromatography on silica (*n*-hexane/DCM = 5:1, v/v). The final product as a white solid has the yield of 74%. <sup>1</sup>H NMR (300 MHz, CDCl<sub>3</sub>) δ(ppm): 7.95 (d, *J* = 8.4 Hz, 2H, Ar-H), 6.87 (d, *J* = 8.4 Hz, 2H, Ar-H), 3.98 (t, *J* = 6.3 Hz, 2H, -OCH<sub>2</sub>-), 3.86 (s, 3H, -CH<sub>3</sub>), 1.77-1.24 (m, 10H, -CH<sub>2</sub>-), 0.86 (t, *J* = 6.3 Hz, 3H, -CH<sub>3</sub>).

(ii) **Synthesis of compound 17.** Compound 16 (9.01g, 36 mmol) and KOH (6.06g, 108mmol) were dissolved in MeOH solvent. The mixed solution was reacted for 24 hours at 90°C. After reaction, the solution was concentrated using a rotary

evaporator, then added HCl aqueous solution until pH=3. The final product as a light white solid has the yield of 94%. <sup>1</sup>H NMR (300 MHz, CDCl<sub>3</sub>) δ(ppm): 7.85 (d, *J* = 8.4 Hz, 2H, Ar-H), 6.98 (d, *J* = 8.4 Hz, 2H, Ar-H), 4.01 (t, *J* = 6.4 Hz, 2H, -OCH<sub>2</sub>-), 7.85 (d, *J* = 8.4 Hz, 2H, Ar-H), 1.74-1.66 (m, 10H, -CH<sub>2</sub>-), 0.84 (t, *J* = 6.3 Hz, 3H, -CH<sub>3</sub>),

**(iii) Synthesis of compound 18.** Compound 17 (9.92g, 42mmol), benzyl 4-hydroxybenzoate (8 g, 35mmol) and DMAP (0.65 g, 5.3mmol) were dissolved in dry DCM upon nitrogen system, then added DCC (14.5g, 70mmol). The solution was reacted for 16 hours at room temperature (30°C). After reaction, the solution first through filtration followed by DCM washing. The solution was extracted with deionized water/DCM, then the organic phase of solution was obtained. The organic phase was dried by MgSO<sub>4</sub> and concentrated using a rotary evaporator. The residue was purified by column chromatography on silica (*n*-hexane/DCM = 5:1, v/v). The final product as a white solid (yield: 87%). <sup>1</sup>H NMR (300 MHz, CDCl<sub>3</sub>) δ(ppm): 8.05 (m, 4H, Ar-H), 7.41 (m, 5H, Ar-H), 7.27 (m, 2H, Ar-H), 6.94 (d, *J* = 8.4 Hz, 2H, Ar-H), 5.36 (s, 2H, -OCH<sub>2</sub>-), 4.10 (t, *J* = 6.3 Hz, 2H, -OCH<sub>2</sub>-), 1.70-1.61 (m, 2H, -CH<sub>2</sub>-), 1.41-1.25 (m, 8H, -CH<sub>2</sub>-), 0.86 (t, *J* = 6.3 Hz, 3H, -CH<sub>3</sub>).

**(iv) Synthesis of H-donor A<sub>II</sub>.** Compound 18 (8.93g, 20mmol) and 15% Pd/C (1.11g) were dissolved in dry THF. The mixed solution was reacted overnight at room temperature in hydrogen system. After reaction, the solution first through filtration followed by THF washing, then concentrated using a rotary evaporator. The residue was recrystallization by *n*-hexane/DCM. The final product as a white solid (yield: 90%). <sup>1</sup>H NMR (300 MHz, CDCl<sub>3</sub>) δ(ppm): 8.05 (m, 4H, Ar-H), 7.35 (d, *J* = 8.4 Hz, 2H, Ar-H), 6.90 (d, *J* = 8.4 Hz, 2H, Ar-H), 4.05 (t, *J* = 6.3 Hz, 2H, -OCH<sub>2</sub>-), 1.70-1.61 (m, 2H, -CH<sub>2</sub>-), 0.86 (t, *J* = 6.3 Hz, 3H, -CH<sub>3</sub>).

**(v) Synthesis of compound 19.** Benzyl 4-hydroxybenzoate (4.47g, 29.4mmol) and PPh<sub>3</sub> (8.89g, 33.8mmol) were dissolved in dry THF. Then added (*S*)-2-octanol (4.6g, 35.2mmol) and DIAD (8.9g, 44mmol) in THF solution. After reaction, the solution was concentrated using a rotary evaporator. The residue was purified by column chromatography on silica (*n*-hexane/DCM = 5:1, v/v). The final product as a white solid has the yield of 74%. <sup>1</sup>H NMR (300 MHz, CDCl<sub>3</sub>) δ(ppm): 7.10 (d, *J* = 8.7 Hz, 2H, Ar-H), 6.87 (d, *J* = 8.7 Hz, 2H, Ar-H), 4.42 (m, 1H, -OCH), 3.88 (s, 3H, -OCH<sub>3</sub>), 1.71-1.57 (m, 2H, -CH<sub>2</sub>-), 1.42-1.25 (m, 11H, -CH<sub>2</sub>), 0.88 (t, *J* = 6.0 Hz, 3H, -CH<sub>3</sub>).

**(vi) Synthesis of compound 20.** Compound 19 (9.51g, 36 mmol) and KOH (6.06g, 108mmol) were dissolved in MeOH solvent. The mixed solution was reacted for 24 hours at 90°C. After reaction, the solution was concentrated using a rotary evaporator, then added HCl aqueous solution until pH=3. The final product as a light white solid has the yield of 94%. <sup>1</sup>H NMR (300 MHz, CDCl<sub>3</sub>) δ(ppm): 8.06 (d, *J* = 8.4 Hz, 2H, Ar-H), 6.92 (d, *J* = 8.0 Hz, 2H, Ar-H), 4.05 (m, 1H, -OCH), 1.78-1.58 (m, 2H, -CH<sub>2</sub>), 1.44-1.26 (m, 11H, -CH<sub>2</sub>), 0.90 (t, *J* = 6.0 Hz, 3H, -CH<sub>3</sub>).

**(vii) Synthesis of compound 21.** Compound 20 (10.51g, 42mmol), benzyl 4-hydroxybenzoate (8 g, 35mmol) and DMAP (0.65 g, 5.3mmol) were dissolved in dry DCM upon nitrogen system, then added DCC (14.5g, 70mmol). The solution was reacted for 16 hours at room temperature (30°C). After reaction, the solution first through filtration followed by DCM washing. The solution was extracted with deionized water/DCM, then the organic phase of solution was obtained. The organic phase was dried by MgSO<sub>4</sub> and concentrated using a rotary evaporator. The residue was purified by column chromatography on silica (*n*-hexane/DCM = 5:1, v/v). The final product as a white solid has the yield of 87%. <sup>1</sup>H NMR (300 MHz, CDCl<sub>3</sub>) δ(ppm): 8.14 (m, *J* = 8.7 Hz, 4H, Ar-H), 7.44-7.32 (m, 5H, Ar-H), 7.27-7.25 (m, 3H, Ar-H), 6.94 (d, *J* = 8.7 Hz, 2H, Ar-H), 5.35 (s, 2H, -OCH<sub>2</sub>-Ph), 4.45 (m, 1H, -OCH), 1.71-1.59 (m, 2H, -CH<sub>2</sub>), 1.42-1.25 (m, 11H, -CH<sub>2</sub>), 0.88 (t, *J* = 6.0 Hz, 3H, -CH<sub>3</sub>).

**(viii) Synthesis of H-donor A<sub>II</sub>\*.** Compound 21 (7.4g, 20mmol) and 15% Pd/C (1.11g) were dissolved in dry THF. The mixed solution was reacted overnight at room temperature in hydrogen system. After reaction, the solution first through filtration followed by THF washing, then concentrated using a rotary evaporator. The residue was recrystallization by *n*-hexane/DCM. The

final product as a white solid has the yield of 90%. <sup>1</sup>H NMR (300 MHz, CDCl<sub>3</sub>) δ(ppm): 8.22-8.14 (m, 4H, Ar-H), 7.33 (d, *J* = 8.4 Hz, 2H, Ar-H), 6.98 (d, *J* = 8.4 Hz, 2H, Ar-H), 4.52 (m, 1H, -OCH), 1.79-1.60 (m, 2H, -CH<sub>2</sub>), 1.39-1.32 (m, 11H, -CH<sub>2</sub>), 0.91

(t, *J* = 5.7 Hz, 3H, -CH<sub>3</sub>).

**(ix) Synthesis of compound 22.** 2-Fluoro-4-methoxyacetophenone (5g, 29.8mmol) was dissolved in 1,4-dioxane solvent. NaOH (3.57g, 89.3mmol) was dissolved in deionized water, then bromine (4.75g, 29.8mmol) was added in NaOH/water solution. The NaOH and bromine solution were slowly added into 2-fluoro-4-methoxyacetophenone solution at 0°C in flask with round bottom. After mixing two solution, the mixed solution was reacted over night at room temperature. The solution was extracted with deionized water/DCM, then got the aqueous phase of solution. The aqueous phase can be maintain acidity at pH=3 by HCl solution, then filtration to give the product. The product was washed by deionized water, and the final product was white solid (yield: 90%). <sup>1</sup>H NMR (300 MHz, CDCl<sub>3</sub>) δ(ppm): 7.9(d, *J* = 8.7 Hz, 1H, Ar-H), 7.83-7.78 (d, *J* = 8.7 Hz, 1H, Ar-H), 7.02 (t, *J* = 9.0 Hz, 1H, Ar-H), 3.97 (s, 3H, -OCH<sub>3</sub>).

**(x) Synthesis of compound 23.** Compound 22 (4.9g, 28.8mmol) was dissolved in dry DCM solvent (30ml), then BBr<sub>3</sub> (14.4g, 57.6mmol) was slowly added at -78°C. The solution was reacted for 12 hours at room temperature, then the reaction was terminated by adding 2N NaOH in solution. The solution was extracted with deionized water/ethyl acetate, then the organic phase of solution was obtained. The organic phase was dried by MgSO<sub>4</sub> and concentrated using a rotary evaporator. The final product was white solid has the yield of 95%. <sup>1</sup>H NMR (300 MHz, CDCl<sub>3</sub>) δ(ppm): 7.62-7.58 (m, 1H, Ar-H), 7.01 (t, *J* = 9.0Hz, 2H, Ar-H).

**(xi) Synthesis of compound 24.** Compound 23 (5g, 32mmol), H<sub>2</sub>SO<sub>4</sub> (7ml), and MeOH (250ml) were mixed together in flask with round bottom, then the mixed solution was reacted for 12 hours at 90°C. The solution was extracted with deionized water/ethyl acetate, then the organic phase of solution was obtained. The organic phase was dried by MgSO<sub>4</sub> and concentrated using a rotary evaporator. The residue was purified by column chromatography on silica (*n*-hexane/ethyl acetate = 3:1, v/v). The final product as a white solid has the yield of 80%. <sup>1</sup>H NMR (300 MHz, CDCl<sub>3</sub>) δ(ppm): 7.76 (d, *J* = 8.7 Hz, 1H, Ar-H), 7.74 (d, *J* = 8.7 Hz, 1H, Ar-H), 7.06 (d, *J* = 9.0 Hz, 1H, Ar-H), 6.10 (s, 1H, Ar-OH), 3.91 (s, 3H, -OCH<sub>3</sub>).

**(xii) Synthesis of compound 25.** Compound 24 (11.05g, 65mmol), K<sub>2</sub>CO<sub>3</sub> (27.2g, 197mmol), and KI (5.5g, 33mmol) were dissolved in acetone, then 1-bromoheptane (14g, 78mmol) was slowly added. The solution was reacted overnight at 60°C. After reaction, the solution was concentrated using a rotary evaporator. The solution was extracted with deionized water/EtOAc, then the organic phase of solution was obtained. The organic phase was dried by MgSO<sub>4</sub> and concentrated using a rotary evaporator. The residue was purified by column chromatography on silica (*n*-hexane/EtOAc = 5:1, v/v). The final product as a white solid has the yield of 94%. <sup>1</sup>H NMR (300 MHz, CDCl<sub>3</sub>) δ(ppm): 7.86 (d, *J* = 9.0 Hz, 1H, Ar-H), 6.69 (d, *J* = 8.7 Hz, 1H, Ar-H), 6.61 (d, *J* = 8.7 Hz, 1H, Ar-H), 3.97 (t, *J* = 6.3 Hz, 2H, -OCH<sub>2</sub>-), 3.87 (s, 3H, -OCH<sub>3</sub>), 1.77 (m, 2H, CH<sub>2</sub>-), 1.45-1.20 (m, 8H, -CH<sub>2</sub>-), 0.87 (t, *J* = 6.3 Hz, 3H, -CH<sub>3</sub>).

**(xiii) Synthesis of compound 26.** Compound 25 (9.66g, 36mmol) and KOH (6.06g, 108mmol) were dissolved in MeOH solvent. The mixed solution was reacted for 24 hours at 90°C. After reaction, the solution was concentrated using a rotary evaporator, then added HCl aqueous solution until pH=3. The final product as a light white solid has the yield of 93%. <sup>1</sup>H NMR (300 MHz, CDCl<sub>3</sub>) δ(ppm): 7.78 (d, *J* = 8.7 Hz, 1H, Ar-H), 6.86 (dd, *J* = 8.7 Hz, 1H, Ar-H), 6.80 (dd, *J* = 8.7 Hz, 1H, Ar-H), 4.03 (t, *J* = 6.7 Hz, 2H, -OCH<sub>2</sub>-), 1.72 (m, 2H, -CH<sub>2</sub>-), 1.38-1.27 (m, 8H, -CH<sub>2</sub>-), 0.86 (t, *J* = 6.7 Hz, 3H, -CH<sub>3</sub>).

**(xiv) Synthesis of compound 27.** Compound 26 (10.68g, 42mmol), benzyl 4-hydroxybenzoate (8 g, 35mmol) and DMAP

(0.65 g, 5.3mmol) were dissolved in dry DCM upon nitrogen system, then DCC (14.5g, 70mmol) was added. The solution was reacted for 16 hours at room temperature. After reaction, the solution first through filtration followed by DCM washing. The solution was extracted with deionized water/DCM, then got the organic phase of solution. The organic phase was dried by  $\text{MgSO}_4$  and concentrated using a rotary evaporator. The residue was purified by column chromatography on silica (*n*-hexane/DCM = 5:1, v/v). The final product as a white solid has the yield of 87%.  $^1\text{H NMR}$  (300 MHz,  $\text{CDCl}_3$ )  $\delta$ (ppm): 8.11 (d,  $J$  = 8.7 Hz, 2H, Ar-H), 8.01 (t,  $J$  = 8.4 Hz, 1H, Ar-H), 7.44-7.34 (m, 4H, Ar-H), 7.32-7.22 (m, 2H, Ar-H), 6.74 (mdd, 1H, Ar-H), 6.70 (m, 2H, Ar-H), 5.35 (s, 2H,  $-\text{CH}_2\text{Ph}$ ), 4.01 (t,  $J$  = 6.3 Hz, 2H,  $-\text{OCH}_2-$ ), 1.77 (t, 2H,  $-\text{CH}_2-$ ), 1.50-1.31 (m, 8H,  $-\text{CH}_2-$ ), 1.02 (t,  $J$  = 6.3 Hz, 3H,  $-\text{CH}_3$ ).

**(xv) Synthesis of H-donor  $\text{A}_{\text{II}}\text{F}$ .** Compound **27** (10g, 21.5mmol) and 15% Pd/C (1.11g) were dissolved in dry THF. The mixed solution was reacted overnight at room temperature in hydrogen system. After reaction, the solution first through filtration followed by THF washing, then concentrated using a rotary evaporator. The residue was recrystallization by *n*-hexane/DCM. The final product as a white solid has the yield of 90%.  $^1\text{H NMR}$  (300 MHz,  $\text{CDCl}_3$ )  $\delta$ (ppm): 8.17 (d,  $J$  = 8.7 Hz, 2H, Ar-H), 8.14 (t,  $J$  = 8.7 Hz, 1H, Ar-H), 7.32 (d,  $J$  = 8.7 Hz, 2H, Ar-H), 6.77 (m, 1H, Ar-H), 6.68 (m, 1H, Ar-H), 4.00 (t,  $J$  = 6.6 Hz, 2H,  $-\text{OCH}_2-$ ), 1.86 (t, 2H,  $-\text{CH}_2-$ ), 1.47-1.27 (m, 8H,  $-\text{CH}_2-$ ), 0.86 (t,  $J$  = 6.5 Hz, 3H,  $-\text{CH}_3$ ).

**(xvi) Synthesis of compound 28.** Compound **24** (5g, 29.4mmol) and  $\text{PPh}_3$  (8.89g, 33.8mmol) were mixed in flask with round bottom upon nitrogen system. The dry DCM was added into flask, then added (S)-2-octanol (4.6g, 35.2mmol) and DIAD (8.9g, 44mmol). After reaction, the solution was concentrated using a rotary evaporator. The residue was purified by column chromatography on silica (*n*-hexane/DCM = 5:1, v/v). The final product as a light yellow oil has the yield of 85%.  $^1\text{H NMR}$  (300 MHz,  $\text{CDCl}_3$ )  $\delta$ (ppm): 7.92 (d,  $J$  = 9.0 Hz, 1H, Ar-H), 7.25 (d,  $J$  = 8.7Hz, 1H, Ar-H), 6.87 (d,  $J$  = 8.7 Hz, 1H, Ar-H), 4.30 (m, 1H,  $-\text{OCH}-$ ), 3.84 (s, 3H,  $-\text{OCH}_3$ ), 1.71-1.57 (m, 2H,  $-\text{CH}_2-$ ), 1.42-1.25 (m, 11H,  $-\text{CH}_2\text{CH}_3$ ), 0.83 (t,  $J$  = 6.0 Hz, 3H,  $-\text{CH}_3$ ).

**(xvii) Synthesis of compound 29.** Compound **28** (10g, 35.5mmol) and KOH (5.95g, 106mmol) were dissolved in MeOH solvent. The mixed solution was reacted for 24 hours at 90°C. After reaction, the solution was concentrated using a rotary evaporator, then added HCl aqueous solution until pH=3. The final product as a light yellow solid has the yield of 89%.  $^1\text{H NMR}$  (300 MHz,  $\text{CDCl}_3$ )  $\delta$ (ppm): 7.96 (t,  $J$  = 8.7 Hz, 1H, Ar-H), 6.71 (d,  $J$  = 9.0 Hz, 1H, Ar-H), 6.50 (d,  $J$  = 9.0 Hz, 1H, Ar-H), 4.41 (m, 1H,  $-\text{OCH}-$ ), 1.79-1.60 (m, 2H,  $-\text{CH}_2-$ ), 1.47-1.26 (m, 11H,  $-\text{CH}_2\text{CH}_3$ ), 0.88 (t,  $J$  = 6.6 Hz, 3H,  $-\text{CH}_3$ ).

**(xviii) Synthesis of compound 30.** Compound **29** (11.25 g, 42mmol), benzyl 4-hydroxybenzoate (8 g, 35mmol), and DMAP (0.65 g, 5.3mmol) were dissolved in dry DCM (250ml) in flask with round bottom upon nitrogen system, then DCC (14.5g, 70mmol) was added in solution. The solution was reacted for 16 hours at room temperature. After reaction, the solution first through filtration followed by DCM washing. The solution was extracted with deionized water/DCM, then the organic phase of solution was obtained. The organic phase was dried by  $\text{MgSO}_4$  and concentrated using a rotary evaporator. The residue was purified by column chromatography on silica (*n*-hexane/DCM = 5:1, v/v). The final product as a light yellow solid has the yield of 87%.  $^1\text{H NMR}$  (300 MHz,  $\text{CDCl}_3$ )  $\delta$ (ppm): 8.13 (d,  $J$  = 8.7 Hz, 2H, Ar-H), 8.02 (t,  $J$  = 9.0 Hz, 1H, Ar-H), 7.45-7.30 (m, 5H, Ar-H), 7.29-7.25 (m, 2H, Ar-H), 6.74 (dd,  $J$  = 8.7 Hz, 1H, Ar-H), 6.66 (dd,  $J$  = 8.7 Hz, 1H, Ar-H), 5.37 (s, 1H,  $-\text{OCH}_2\text{Ph}$ ), 4.40 (m, 1H,  $-\text{OCH}-$ ), 1.70-1.61 (m, 2H,  $-\text{CH}_2-$ ), 1.41-1.26 (m, 11H,  $-\text{CH}_2\text{CH}_3$ ), 0.86 (t,  $J$  = 6.0 Hz, 3H,  $-\text{CH}_3$ ).

**(xix) Synthesis of H-donor  $\text{A}_{\text{II}}\text{F}^*$ .** Product **30** (10g, 20 mmol) and 15% Pd/C (1.5 g) were dissolved in dry THF. The mixed solution was reacted overnight at room temperature in hydrogen system. After reaction, the solution first through filtration followed by THF washing, then concentrated using a rotary evaporator. The residue was recrystallization by *n*-hexane/DCM. The final product as a white solid has the yield of 95%.  $^1\text{H NMR}$  (300 MHz,  $\text{CDCl}_3$ )  $\delta$ (ppm): 8.16 (d,  $J$  = 8.7 Hz, 2H, Ar-H), 8.03 (t,  $J$

= 8.0 Hz, 1H, Ar-H), 7.32 (m, 2H, Ar-H), 6.74 (dd,  $J = 9.0$  Hz, 1H, Ar-H), 6.68 (dd,  $J = 11.7$  Hz, 1H, Ar-H), 4.42 (m, 1H, -OCH-), 1.71-1.60 (m, 2H, -CH<sub>2</sub>-), 1.33-1.27 (m, 11H, -CH<sub>2</sub>CH<sub>3</sub>), 0.86 (t,  $J = 6.3$  Hz, 3H, -CH<sub>3</sub>).

**(xx) Synthesis of compound 31.** Compound A<sub>II</sub>F\* (6g, 15.4mmol), benzyl 4-hydroxybenzoate (2.9g, 12.8mmol), and DMAP (0.16 g, 1.3mmol) were dissolved in dry DCM (250ml) in flask with round bottom upon nitrogen system, then DCC (7.9g, 38.4mmol) was added in solution. The solution was reacted for 16 hours at room temperature. After reaction, the solution first through filtration followed by DCM washing. The solution was extracted with deionized water/DCM, then the organic phase of solution was obtained. The organic phase was dried by MgSO<sub>4</sub> and concentrated using a rotary evaporator. The residue was purified by column chromatography on silica (*n*-hexane/DCM = 5:1, v/v). The final product as a light yellow solid has the yield of 85%. <sup>1</sup>H NMR (300 MHz, CDCl<sub>3</sub>) δ(ppm): 8.25 (d,  $J = 7.2$  Hz, 2H, Ar-H), 8.10 (d,  $J = 8.0$  Hz, 2H, Ar-H), 8.00 (d,  $J = 7.8$  Hz, 1H, Ar-H), 7.50 (d,  $J = 7.6$  Hz, 2H, Ar-H), 7.42 (d,  $J = 7.6$  Hz, 2H, Ar-H), 7.40-7.32 (m, 5H, Ar-H), 7.25 (d,  $J = 6.8$  Hz, 1H, Ar-H), 7.00 (d,  $J = 8.0$  Hz, 1H, Ar-H), 5.28 (s, 2H, -CH<sub>2</sub>Ph), 3.86 (m, 1H, -OCH<sub>2</sub>-), 1.67 (d,  $J = 7.8$  Hz, 2H, -CH<sub>2</sub>-), 1.40 (d,  $J = 8.1$  Hz, 3H, -CH<sub>3</sub>), 1.31-1.25 (m, 8H, -CH<sub>2</sub>-), 0.85 (t,  $J = 8.6$  Hz, 2H, -CH<sub>3</sub>).

**(xxi) Synthesis of H-donor A<sub>III</sub>F\*.** Compound 31 (5g, 8.35mmol) and 15% Pd/C (1.5 g) were dissolved in dry THF. The mixed solution was reacted overnight at room temperature in hydrogen system. After reaction, the solution first through filtration followed by THF washing, then concentrated using a rotary evaporator. The residue was recrystallization by *n*-hexane/DCM. The final product as a white solid has the yield of 92%. <sup>1</sup>H NMR (300 MHz, CDCl<sub>3</sub>) δ(ppm): 8.30 (d,  $J = 8.4$  Hz, 2H, Ar-H), 8.20 (d,  $J = 8.6$  Hz, 2H, Ar-H), 8.02 (d,  $J = 8.4$  Hz, 1H, Ar-H), 7.40 (d,  $J = 8.6$  Hz, 2H, Ar-H), 7.30 (d,  $J = 8.5$  Hz, 2H, Ar-H), 6.75 (d,  $J = 8.2$  Hz, 1H, Ar-H), 4.40 (m, 1H, -OCH<sub>2</sub>-), 1.60 (m, 2H, -CH<sub>2</sub>-), 1.30-1.25 (m, 8H, -CH<sub>2</sub>-), 0.89 (t,  $J = 8.7$  Hz, 3H, -CH<sub>3</sub>).

H-acceptor C (**P<sub>II</sub>\***)

102052132 13 (1.347) Cn (Cen, 4, 80.00, Ht); Sm (SG, 4x1.00); Sb (2,20.00); Cm (1:14)

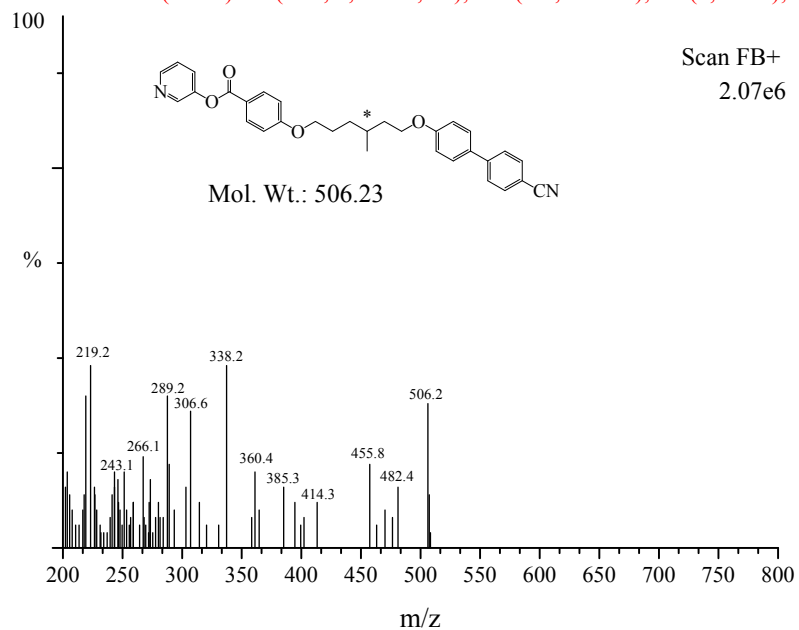

Fig. S2 Mass spectrum of H-acceptor **P<sub>II</sub>\***.

H-acceptor C (**P<sub>III</sub>**)

102052132 13 (1.347) Cn (Cen, 4, 80.00, Ht); Sm (SG, 4x1.00); Sb (2,20.00); Cm (1:14)

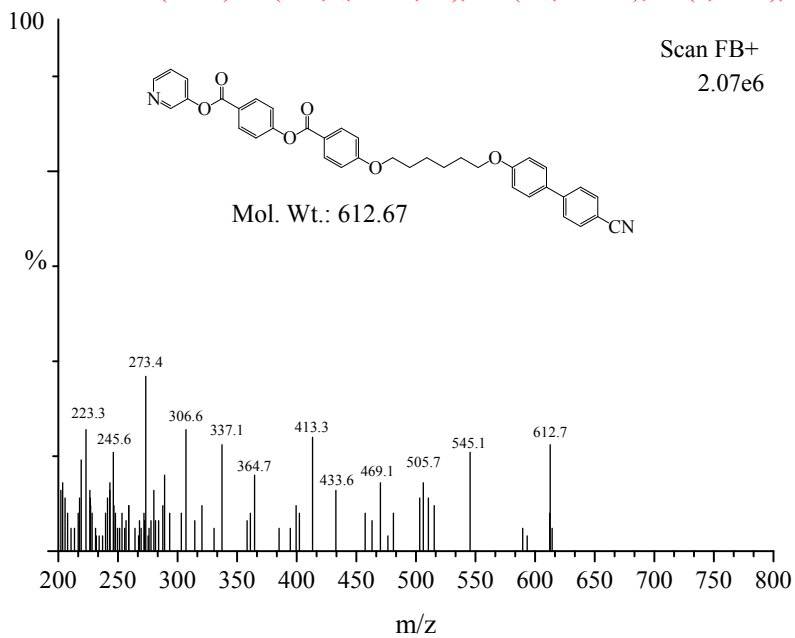

Fig. S3 Mass spectrum of H-acceptor **P<sub>III</sub>**.

H-acceptor C (**P<sub>III</sub>\***)

102052132 13 (1.347) Cn (Cen, 4, 80.00, Ht); Sm (SG, 4x1.00); Sb (2,20.00); Cm (1:14)

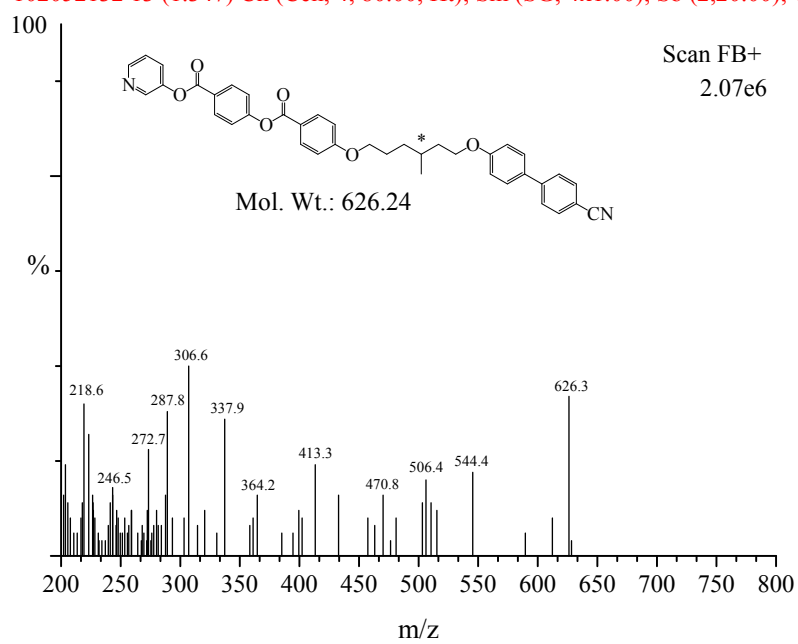

Fig. S4 Mass spectrum of H-acceptor **P<sub>III</sub>\***.

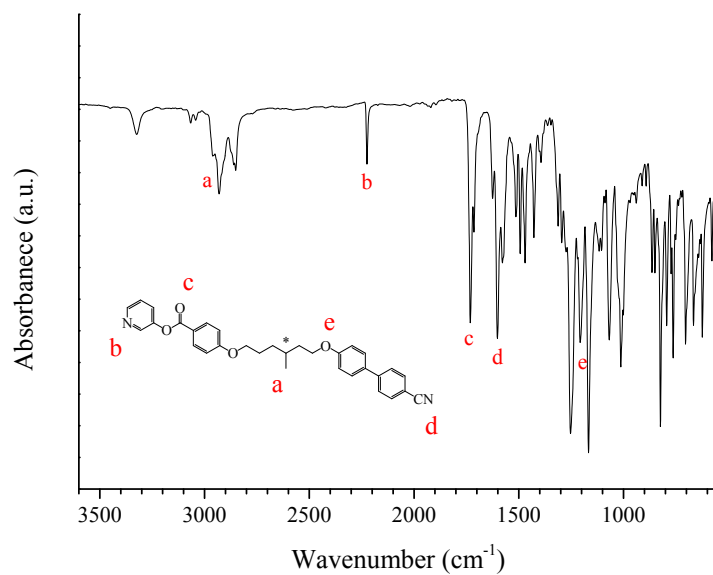

Fig. S5 Infrared spectrum of H-acceptor P<sub>II</sub>\*.

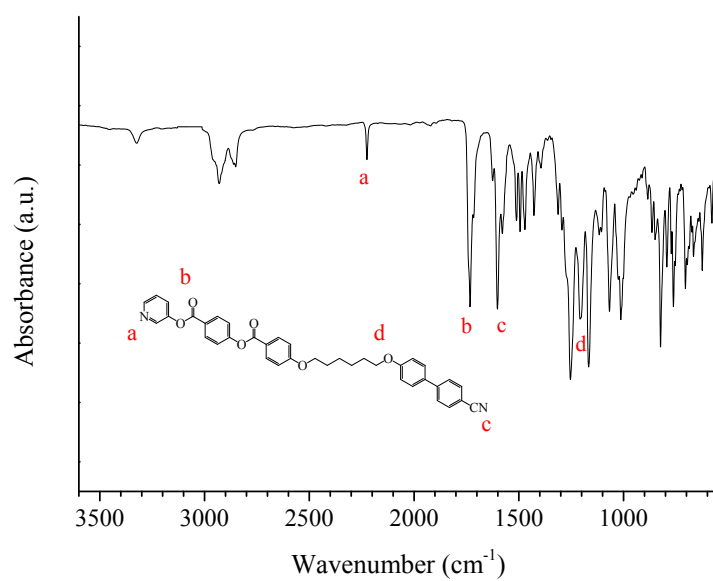

Fig. S6 Infrared spectrum of H-acceptor P<sub>III</sub>.



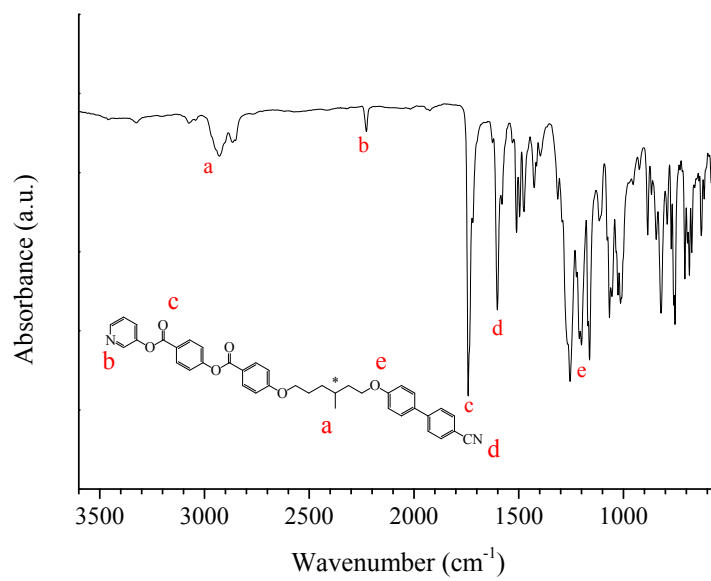

**Fig. S7** Infrared spectrum of H-acceptor  $P_{III}^*$ .
